# Supplementary material for: Genome-scale identification of transcription factors that mediate an inflammatory network during breast cellular transformation
Source: PubMed Central journal article supplement (PMC5970197; doi:10.1038/s41467-018-04406-2), 2018-05-25
Supplement: 41467_2018_4406_MOESM3_ESM.pdf [file 41467_2018_4406_MOESM3_ESM.pdf]

## **Description of Additional Supplementary Files**

File Name: Supplementary Data 1

Description: List of superenhancers identified using H3K27ac ChIP-seq data during cell transformation.

File Name: Supplementary Data 2

Description: List of transcription factors ranked based on TFScores.

File Name: Supplementary Data 3

Description: siRNAs for transcription factors in Figure 5.

File Name: Supplementary Data 4

Description: qPCR Primer sequences for transcription factors in Figure 5.
